# Supplementary material for: Celiac disease symptom profiles and their relationship to gluten-free diet adherence, mental health, and quality of life
Source: Springer Nature journal article supplement (doi:10.1186/s12876-023-03101-x), 2024-01-02
Supplement: MOESM1 [file 26582724]

**Supplement Table 1. Full Results of Auxiliary Analyses (N = 317 unless otherwise specified)**

| Domain Measure                    | Profile 1 (n = 117)<br>M (SD)                                                                                                                                                                      | Profile 2 (n = 106)<br>M (SD)                                                                                                                                                                      | Profile 3 (n = 75)<br>M (SD)                                                                                                                                                                       | Profile 4 (n = 19)<br>M (SD)                                                                                                                                                                       | Test statistic                     | Significant post-hoc differences, p < .05 |
|-----------------------------------|----------------------------------------------------------------------------------------------------------------------------------------------------------------------------------------------------|----------------------------------------------------------------------------------------------------------------------------------------------------------------------------------------------------|----------------------------------------------------------------------------------------------------------------------------------------------------------------------------------------------------|----------------------------------------------------------------------------------------------------------------------------------------------------------------------------------------------------|------------------------------------|-------------------------------------------|
| <b>Sociodemographic Variables</b> |                                                                                                                                                                                                    |                                                                                                                                                                                                    |                                                                                                                                                                                                    |                                                                                                                                                                                                    |                                    |                                           |
| Age                               | 42.26 (1.43)                                                                                                                                                                                       | 40.02 (1.42)                                                                                                                                                                                       | 41.28 (1.78)                                                                                                                                                                                       | 37.95 (3.15)                                                                                                                                                                                       | $\chi^2(3,317) = 2.22, p = .53$    | --                                        |
| Sex                               | Male = 0.14<br>Female = 0.85<br>Other = 0.01                                                                                                                                                       | Male = 0.08<br>Female = 0.91<br>Other = 0.02                                                                                                                                                       | Male = 0.14<br>Female = 0.86<br>Other = 0.00                                                                                                                                                       | Male = 0.09<br>Female = 0.91<br>Other = 0.00                                                                                                                                                       | $\chi^2(6,317) = 5.35, p = .50$    | --                                        |
| Race (White, Other)               | White = .87<br>Other = .13                                                                                                                                                                         | White = .95<br>Other = .05                                                                                                                                                                         | White = .95<br>Other = .05                                                                                                                                                                         | White = .95<br>Other = .05                                                                                                                                                                         | $\chi^2(3,317) = 4.14, p = .25$    | --                                        |
| Education level (n = 278)         | No school = .01<br>Some primary school = .05<br>HS diploma = .15<br>Vocational, Associates Degree, Trade School = .10<br>Some college = .42<br>Bachelors = .04<br>Masters = .19<br>Doctorate = .05 | No school = .01<br>Some primary school = .03<br>HS diploma = .15<br>Vocational, Associates Degree, Trade School = .12<br>Some college = .40<br>Bachelors = .03<br>Masters = .20<br>Doctorate = .07 | No school = .02<br>Some primary school = .04<br>HS diploma = .13<br>Vocational, Associates Degree, Trade School = .25<br>Some college = .32<br>Bachelors = .02<br>Masters = .19<br>Doctorate = .04 | No school = .00<br>Some primary school = .07<br>HS diploma = .12<br>Vocational, Associates Degree, Trade School = .34<br>Some college = .42<br>Bachelors = .00<br>Masters = .07<br>Doctorate = .00 | $\chi^2(21,277) = 45.05, p = .002$ | 1 v. 4<br>2 v. 4                          |
| Household income level (n = 228)  | Less than \$50K = .22<br>\$50K-100K = .38<br>\$100K-200K = .35<br>\$200K or more = .10                                                                                                             | Less than \$50K = .24<br>\$50K-100K = .36<br>\$100K-200K = .26<br>\$200K or more = .14                                                                                                             | Less than \$50K = .24<br>\$50K-100K = .41<br>\$100K-200K = .29<br>\$200K or more = .06                                                                                                             | Less than \$50K = .31<br>\$50K-100K = .45<br>\$100K-200K = .24<br>\$200K or more = .00                                                                                                             | $\chi^2(9,277) = 36.45, p < .001$  | 1 v. 4<br>2 v. 4                          |
| <b>Disease Factors</b>            |                                                                                                                                                                                                    |                                                                                                                                                                                                    |                                                                                                                                                                                                    |                                                                                                                                                                                                    |                                    |                                           |
| Age at diagnosis                  | 35.77 (1.41)                                                                                                                                                                                       | 34.30 (1.43)                                                                                                                                                                                       | 35.78 (1.78)                                                                                                                                                                                       | 31.94 (3.22)                                                                                                                                                                                       | $\chi^2(3,317) = 1.64, p = .65$    | --                                        |
| Years since diagnosis             | 6.31 (0.77)                                                                                                                                                                                        | 5.71 (0.67)                                                                                                                                                                                        | 5.50 (0.78)                                                                                                                                                                                        | 6.13 (1.74)                                                                                                                                                                                        | $\chi^2(3,317) = 0.64, p = .89$    | --                                        |
| Reason for diagnostic testing     | Probabilities<br>Symptomatic = .74<br>Other = .26                                                                                                                                                  | Probabilities<br>Symptomatic = .77<br>Other = .23                                                                                                                                                  | Probabilities<br>Symptomatic = .80<br>Other = .21                                                                                                                                                  | Probabilities<br>Symptomatic = .79<br>Other = .21                                                                                                                                                  | $\chi^2(3,317) = 0.74, p = .86$    | --                                        |

| <b>Gluten-Free Diet Adherence</b>                             |              |              |              |              |                                                       |
|---------------------------------------------------------------|--------------|--------------|--------------|--------------|-------------------------------------------------------|
| CDAT total score                                              | 13.41 (0.33) | 13.67 (0.24) | 12.05 (0.37) | 15.18 (0.89) | $\chi^2 (3,317) = 17.04, p = .001$ 1,2,4 > 3          |
| CDAT without symptom items                                    | 7.68 (0.23)  | 7.74 (0.24)  | 7.68 (0.29)  | 7.81 (0.57)  | $\chi^2 (3,317) = 0.07, p = .99$ --                   |
| <b>Anxiety and Depression</b>                                 |              |              |              |              |                                                       |
| PROMIS-29 Anxiety                                             | 55.22 (0.89) | 53.85 (0.91) | 52.87 (1.12) | 58.35 (2.07) | $\chi^2 (3,317) = 6.72, p = .08$ 4 > 2,3              |
| PROMIS-29 Depression                                          | 52.89 (0.89) | 51.28 (0.89) | 50.04 (1.07) | 56.96 (2.04) | $\chi^2 (3,317) = 10.83, p = .001$ 4 > 2,3            |
| <b>General Health-Related Quality of Life and Functioning</b> |              |              |              |              |                                                       |
| SF-36 Physical Functioning                                    | 80.37 (2.14) | 81.80 (2.10) | 85.08 (2.28) | 71.88 (6.11) | $\chi^2 (3,317) = 5.14, p = .16$ 3 > 4                |
| SF-36 Role Limitations due to Physical Health                 | 53.72 (4.01) | 52.71 (4.10) | 66.97 (4.74) | 40.97 (9.20) | $\chi^2 (3,317) = 9.00, p = .03$ 3 > 1,2,4            |
| SF-36 Role Limitations due to Emotional Health                | 51.36 (3.98) | 61.50 (3.98) | 61.82 (4.88) | 31.63 (8.49) | $\chi^2 (3,317) = 13.47, p = .004$ 1,2,3 > 4          |
| SF-36 Emotional Wellbeing                                     | 61.20 (1.85) | 65.63 (1.81) | 69.65 (2.13) | 50.73 (4.50) | $\chi^2 (3,317) = 18.71, p < .001$ 1,2,3 > 4<br>3 > 1 |
| SF-36 Energy/Fatigue                                          | 38.37 (2.20) | 38.17 (2.25) | 45.02 (2.87) | 23.69 (4.16) | $\chi^2 (3,317) = 18.24, p < .001$ 1,2,3 > 4          |
| SF-36 Social Functioning                                      | 68.14 (2.47) | 72.08 (2.43) | 76.33 (2.81) | 60.26 (6.03) | $\chi^2 (3,317) = 8.27, p = .04$ 3 > 1,4              |
| SF-36 Bodily Pain                                             | 61.88 (2.29) | 59.32 (2.40) | 65.15 (2.82) | 52.68 (5.73) | $\chi^2 (3,317) = 4.87, p = .18$ 3 > 4                |
| SF-36 General Health                                          | 49.72 (2.20) | 49.93 (2.27) | 57.36 (2.71) | 42.84 (5.14) | $\chi^2 (3,317) = 8.59, p = .04$ 3 > 1,2,4            |
| PROMIS-29 Pain Interference                                   | 52.69 (0.87) | 52.80 (0.90) | 51.55 (1.07) | 53.37 (2.10) | $\chi^2 (3,317) = 1.13, p = .77$ --                   |

|                                                             |              |              |              |              |                                                     |                    |
|-------------------------------------------------------------|--------------|--------------|--------------|--------------|-----------------------------------------------------|--------------------|
| PROMIS-29 Physical Function                                 | 49.11 (0.77) | 48.83 (0.79) | 50.94 (0.90) | 45.60 (1.88) | $\chi^2(3,317) = 7.60, p = .06$                     | 3 > 4              |
| PROMIS-29 Ability to Participate in Social Roles/Activities | 48.79 (0.87) | 50.51 (0.90) | 51.88 (1.11) | 44.04 (1.93) | <b><math>\chi^2(3,317) = 14.40, p = .002</math></b> | 1,2,3 > 4<br>3 > 1 |
| PROMIS-29 Fatigue                                           | 58.09 (1.04) | 58.43 (1.07) | 54.61 (1.36) | 63.28 (2.2)  | <b><math>\chi^2(3,317) = 12.11, p = .007</math></b> | 4 > 1,2 > 3        |
| PROMIS-29 Sleep Disturbance                                 | 53.76 (0.75) | 52.91 (0.77) | 50.20 (0.95) | 57.99 (1.76) | <b><math>\chi^2(3,317) = 17.70, p = .001</math></b> | 4 > 1,2 > 3        |
| <b>Coeliac Disease-Specific Quality of Life</b>             |              |              |              |              |                                                     |                    |
| CD-QOL Total                                                | 62.72 (1.51) | 62.62 (1.54) | 60.59 (1.89) | 65.80 (3.56) | $\chi^2(3,317) = 1.90, p = .59$                     | --                 |
| CD-QOL Limitations                                          | 29.72 (0.77) | 29.84 (0.79) | 28.94 (0.97) | 31.76 (1.79) | $\chi^2(3,317) = 1.97, p = .58$                     | --                 |
| CD-QOL Dysphoria                                            | 9.50 (0.38)  | 9.08 (0.38)  | 8.87 (0.45)  | 10.22 (0.96) | $\chi^2(3,317) = 2.39, p = .50$                     | --                 |
| CD-QOL Health concerns                                      | 16.66 (0.46) | 17.13 (0.46) | 16.24 (0.58) | 17.38 (1.05) | $\chi^2(3,317) = 1.84, p = .61$                     | --                 |
| CD-QOL Inadequate treatment                                 | 6.85 (0.19)  | 6.58 (0.20)  | 6.55 (0.24)  | 6.40 (0.46)  | $\chi^2(3,317) = 1.68, p = .64$                     | --                 |

*Note.* *M* = mean; *SD* = standard deviation; CSI = Celiac Symptom Index; CDAT = Celiac Dietary Adherence Test; PROMIS = Patient-Reported Outcomes Measurement Information System®; SF-36 = Short-Form 36; CD-QOL = Coeliac Disease Quality of Life Survey. All values are raw scores except for PROMIS measures, which are *t*-scores. **Bold** text indicates  $p \leq .05$ .
